# Supplementary material for: Synthesis of MIL-88B(Fe)/Matrimid mixed-matrix membranes with high hydrogen permselectivity
Source: Royal Society of Chemistry journal article supplement (doi:10.1039/c4ra13727b), 2014-12-19
Supplement: c4ra13727b1.pdf [file c4ra13727b1.pdf]

## Supporting Information for

### Synthesis of MIL-88B(Fe)/Matrimid mixed-matrix membranes with high hydrogen permselectivity

*Yuanlong Xiao,<sup>a</sup> Xiangyu Guo,<sup>a</sup> Hongliang Huang,<sup>a</sup> Qingyuan Yang,<sup>a</sup> Aisheng Huang<sup>\*,b</sup> and  
Chongli Zhong<sup>\*,a</sup>*

<sup>a</sup> State Key Laboratory of Organic-Inorganic Composites, Beijing University of Chemical  
Technology, Beijing, 100029, China;

<sup>b</sup> Institute of New Energy Technology, Ningbo Institute of Material Technology and  
Engineering, Ningbo 315201, China

\* Corresponding authors. E-mail: [huangaisheng@nimte.ac.cn](mailto:huangaisheng@nimte.ac.cn), [zhongcl@mail.buct.edu.cn](mailto:zhongcl@mail.buct.edu.cn)

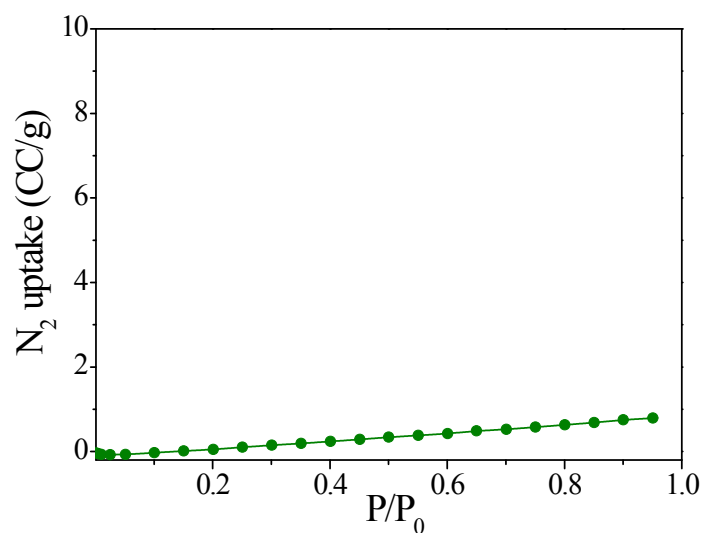

**Fig. S1** N<sub>2</sub> adsorption isotherm in MIL-88B(Fe) at 298 K.

**Table S1.** Comparison of the H<sub>2</sub> permeability and H<sub>2</sub>/CH<sub>4</sub> separation factor of different MMMs in this work and literature.

| MMMs                             | Loading (%) | Testing condition | H <sub>2</sub> permeability | H <sub>2</sub> /CH <sub>4</sub> separation factor | Ref. |
|----------------------------------|-------------|-------------------|-----------------------------|---------------------------------------------------|------|
| ZIF-71/6FDA-Durene <sup>a</sup>  | 10          | 308 K,<br>3.5 bar | 1563                        | 14                                                | 1    |
| Silicalite-1/Matrimid            | 8           | 308 K,<br>2.8 bar | 38                          | 180                                               | 2    |
| MWCNT/PBMPI                      | 10          | 299 K,<br>2.0 bar | 12                          | 8                                                 | 3    |
| Cu-BPY-HFS/Matrimid <sup>a</sup> | 10          | 308 K,<br>2.0 bar | 17                          | 69                                                | 4    |
| MOF-5/Matrimid <sup>a</sup>      | 10          | 308 K,<br>2.6 bar | 30                          | 137                                               | 5    |
| ZIF-8/PSF                        | 16          | 308 K,<br>2.8 bar | 40                          | 120                                               | 6    |
| ZIF-8/Matrimid <sup>a</sup>      | 10          | 294 K,<br>4.0 bar | 53                          | 118                                               | 7    |
| MCM-41/PSF                       | 8           | 308 K,<br>3.2 bar | 25                          | 30                                                | 8    |

|                      |    |                   |     |    |           |
|----------------------|----|-------------------|-----|----|-----------|
| JDF-L1/Copolyimide   | 10 | 308 K,<br>3.5 bar | 150 | 35 | 9         |
| MIL-88B(Fe)/Matrimid | 10 | 298 K,<br>3.0 bar | 440 | 96 | This work |

<sup>a</sup> Permeability data were taken from the single gas measurements.

---

## References

- 1 S. Japip, H. Wang, Y. Xiao and T. S. Chung, *J. Membr. Sci.*, 2014, **467**, 162.
- 2 B. Zornoza, O. Esekile, W. J. Koros, C. Téllez and J. Coronas, *Sep. Purif. Technol.*, 2011, **77**, 137.
- 3 T. H. Weng, H. H. Tseng and M. Y. Wey, *Int. J. Hydrogen Energy*, 2009, **34**, 8707.
- 4 Y. Zhang, I. H. Musselman, J. P. Ferraris and K. J. Balkus Jr., *J. Membr. Sci.*, 2008, **313**, 170.
- 5 E. V. Perez, J. Balkus Jr., J. P. Ferraris and I. H. Musselman, *J. Membr. Sci.*, 2009, **328**, 165.
- 6 B. Zornoza, B. Seoane, J. M. Zamaro, C. Téllez and J. Coronas, *ChemPhysChem*, 2011, **12**, 2781.
- 7 Q. Song, S. K. Nataraj, M. V. Roussanova, J. C. Tan, D. J. Hughes, W. Li, P. Bourgoïn, M. A. Alam, A. K. Cheetham, S. A. Al-Muhtaseb and E. Sivaniah, *Energy Environ., Sci.*, 2012, **5**, 8359.
- 8 P. Burmann, B. Zornoza, C. Téllez and J. Coronas, *Chem. Eng. Sci.*, 2014, **107**, 66.
- 9 A. Galve, D. Sieffert, E. Vispe, C. Téllez, J. Coronas and C. Staudt, *J. Membr. Sci.*, 2011, **370**, 131.
